# Supplementary material for: Ozone dry deposition through plant stomata: Multi-model comparison with flux observations and the role of water stress as part of AQMEII4 Activity 2
Source: Copernicus journal article supplement (doi:10.5194/egusphere-2024-3038), 2024-10-09
Supplement: Supplementary file 1 [file egusphere-2024-3038-supplement.pdf]

## Ozone dry deposition through plant stomata: Multi-model comparison with flux observations and the role of water stress as part of AQMEII4 Activity 2

Khan et al.

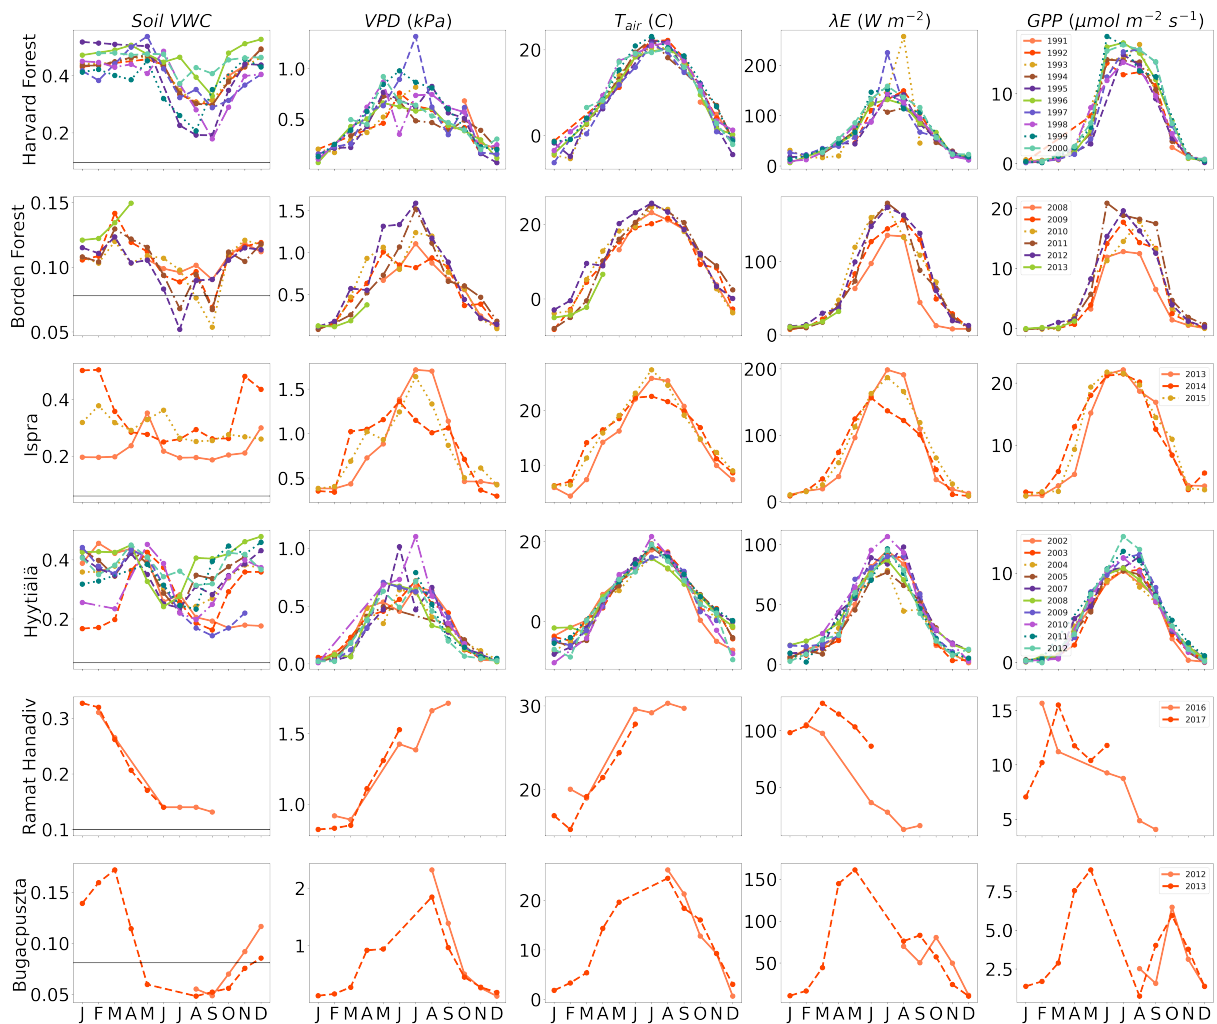

Figure S1: Monthly averages of soil volumetric water content (*Soil VWC*), air vapor pressure deficit at measurement height (*VPD*), air temperature ( $T_{air}$ ), latent heat flux ( $\lambda E$ ), and gross primary productivity (*GPP*) at flux tower sites used in the study. Rows are labeled by site and columns are labeled by the variable plotted on the y-axis. The horizontal gray line in column 1 marks the wilting point for soil moisture that was set for the site in single-point model base simulations. Details about site observations are listed in Table 1. Months without dots do not have available data.

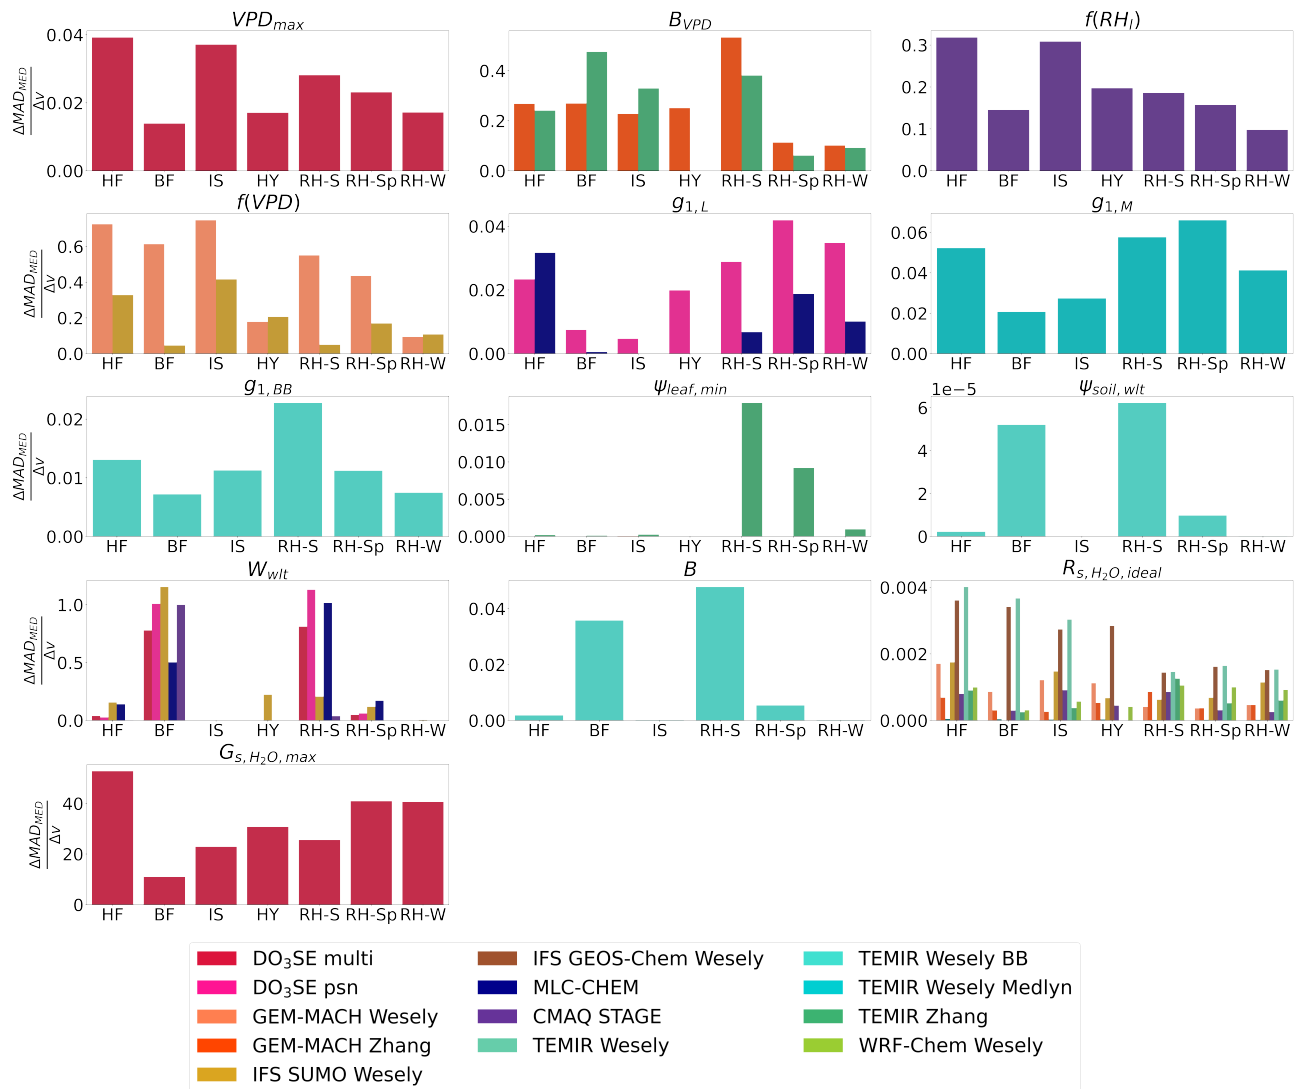

Figure S2: Comparisons of the change in median absolute difference between single point modeled  $eg_s$  and flux-based  $eg_{s,MED}$  ( $\Delta MAD_{MED}$ ) with change in a parameter or stress function value ( $\Delta v$ ) for each parameter and stress function at each site. For each model-parameter pair or model-stress function pair, one summer  $\frac{\Delta MAD_{MED}}{\Delta v}$  was calculated for Harvard Forest (HF), Borden Forest (BF), Ispra, (IS), and Hyttiälä (HY), and three  $\frac{\Delta MAD_{MED}}{\Delta v}$  were calculated for Ramat Hanadiv: winter (RH-W), spring (RH-Sp), and summer (RH-S).  $MAD_{MED}$  was calculated using daytime (half-) hourly estimates of  $eg_s$ .

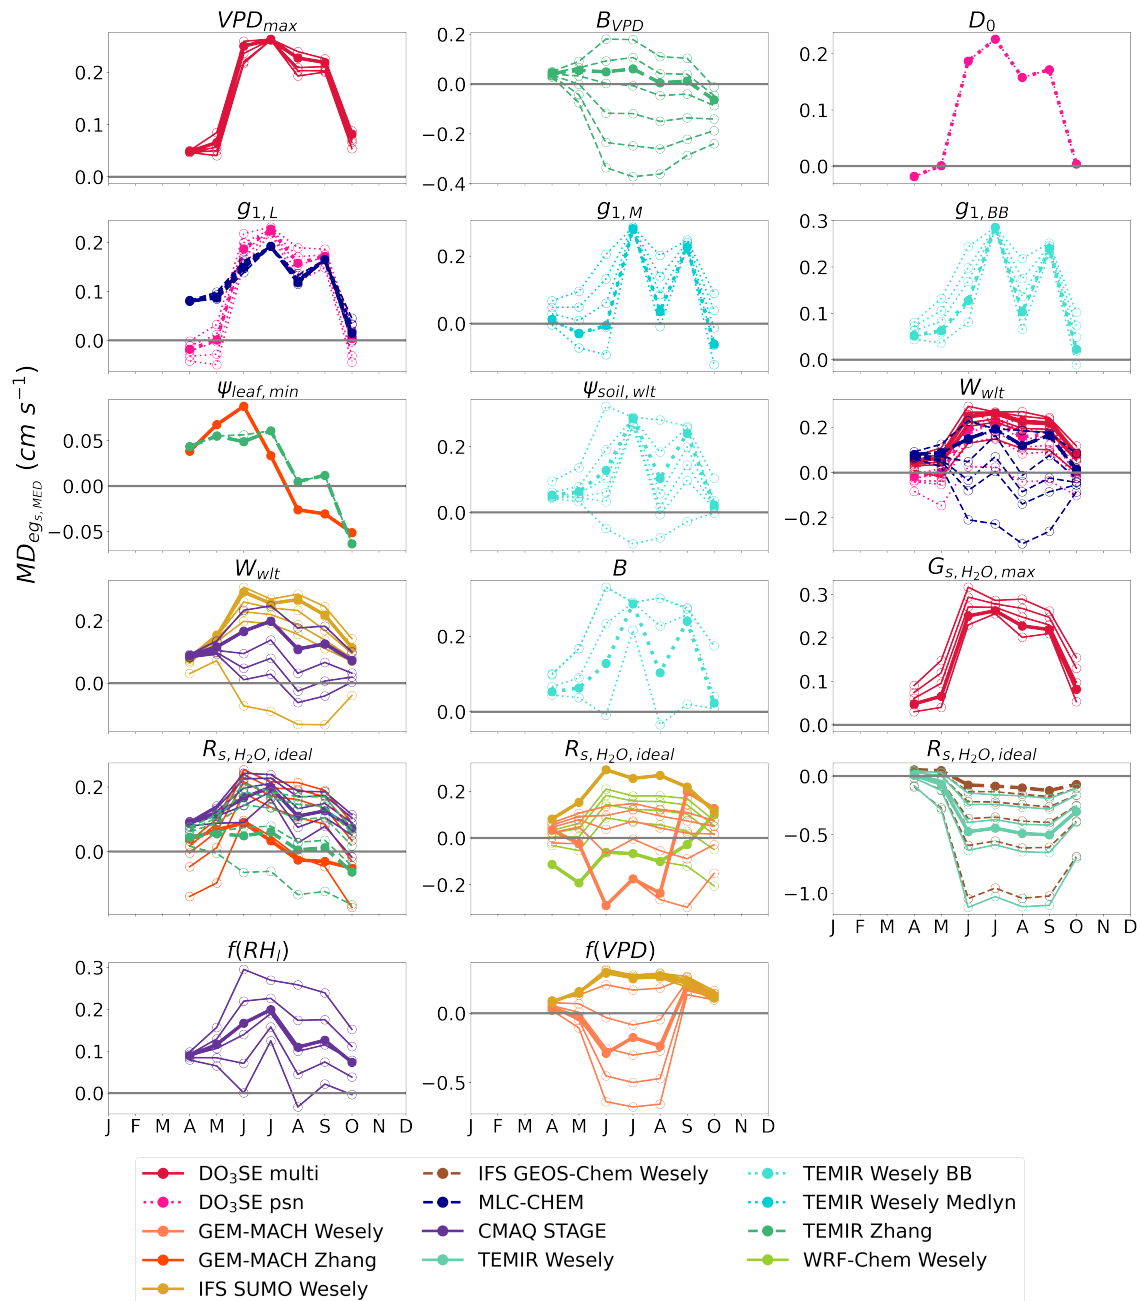

Figure S3: The 2011 and 2012 multiyear monthly median difference between single-point modeled  $eg_s$  and observed flux-based  $eg_{s,MED}$  ( $MD_{eg_{s,MED}}$ ) at Borden Forest for base and sensitivity simulations of single-point models. Sensitivity simulations perturbed the values of each parameter and stress function. Lines with filled dots show the  $MD_{eg_{s,MED}}$  for base simulations of single-point models. Lines with open dots show the  $MD_{eg_{s,MED}}$  for each parameter or stress function perturbation where each line represents one perturbation. Table 2 lists the interpretation of the parameters, stress functions, and the values used for sensitivity simulations.  $W_{wlt}$  and  $R_{s,H_2O,ideal}$  are shared among many models, and they are displayed in multiple plots to avoid plotting many model results in a single plot.

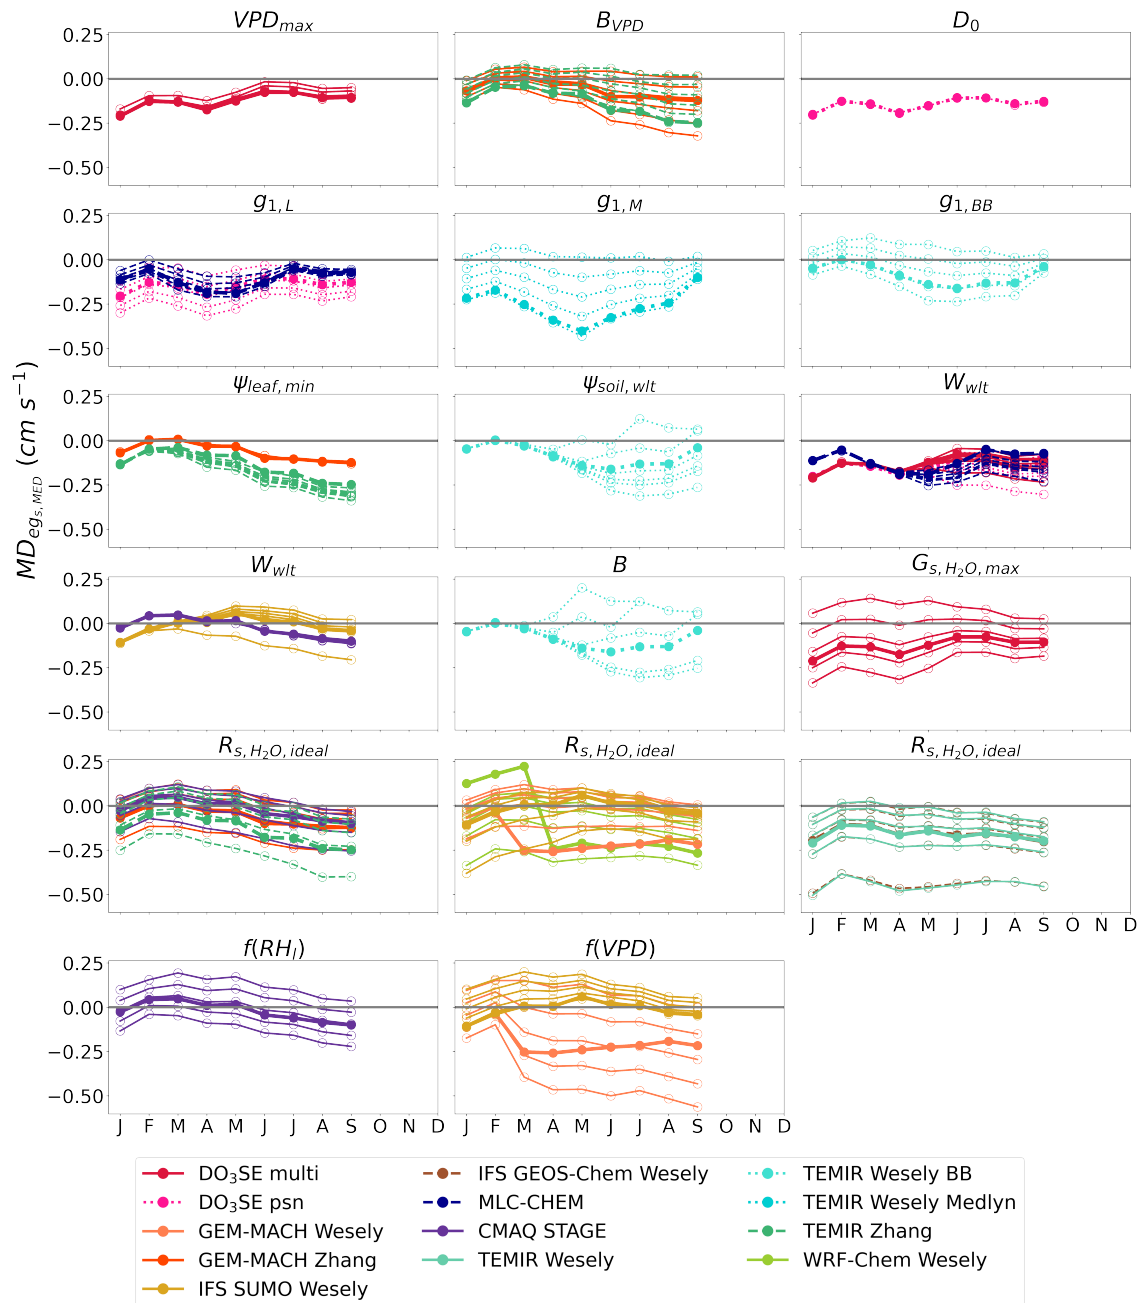

Figure S4: Monthly median difference between single-point modeled  $eg_s$  and observed flux-based  $eg_{s,MED}$  ( $MD_{eg_{s,MED}}$ ) at Ramat Hanadiv for base and sensitivity simulations of single-point models. Some months have multiple years of data. Sensitivity simulations perturbed the values of each parameter and stress function. Lines with filled dots show the  $MD_{eg_{s,MED}}$  for base simulations of single-point models. Lines with open dots show the  $MD_{eg_{s,MED}}$  for each parameter or stress function perturbation where each line represents one perturbation. Table 2 lists the interpretation of the parameters, stress functions, and the values used for sensitivity simulations.  $W_{wlt}$  and  $R_{s,H_2O,ideal}$  are shared among many models, and they are displayed in multiple plots to avoid plotting many model results in a single plot.
